# Supplementary material
Source: HighWire-hosted journal article supplement (https://bmjopen.bmj.com/content/14/7/e082387)
Supplement: inline-supplementary-material-9 [file inline-supplementary-material-9.pdf]

Supplementary File 9

Implementation Research Logic Model

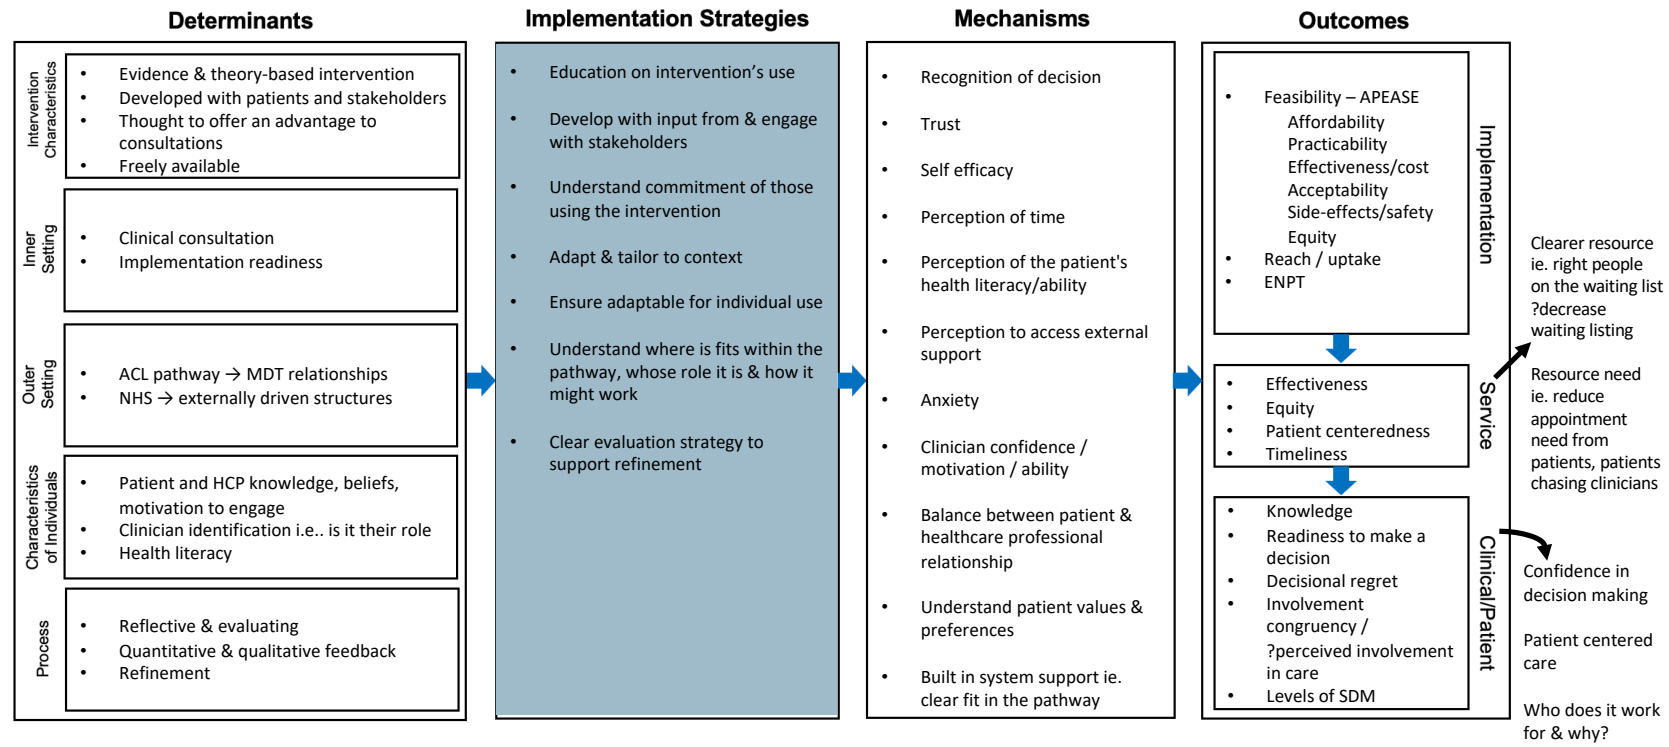

Implementation strategies mapped to ENPT

| Potential                                                                                                                                                                                                                                                                                                                                              | Capacity                                                                                                                                                                                                                                                                 |
|--------------------------------------------------------------------------------------------------------------------------------------------------------------------------------------------------------------------------------------------------------------------------------------------------------------------------------------------------------|--------------------------------------------------------------------------------------------------------------------------------------------------------------------------------------------------------------------------------------------------------------------------|
| <p>Potential to enact/deliver the intervention</p> <ul style="list-style-type: none"><li>➤ Engage with stakeholders</li></ul>                                                                                                                                                                                                                          | <p>How does the intervention work in the pathway</p> <ul style="list-style-type: none"><li>➤ NHS</li><li>➤ Between clinicians – coordination of action(s)</li></ul> <p>How does the intervention work during consultations between patients and clinicians</p>           |
| Capability                                                                                                                                                                                                                                                                                                                                             | Contribution                                                                                                                                                                                                                                                             |
| <p>How does the intervention integrate with the NHS system, consultations and pathway</p> <ul style="list-style-type: none"><li>➤ Strategy = clear about use, when, how</li><li>➤ Adapt &amp; tailor to context</li></ul> <p>Workability</p> <ul style="list-style-type: none"><li>➤ Design with key stakeholders</li><li>➤ Paper and online</li></ul> | <p>Educate those using it (coherence)</p> <p>Understand commitment from patients and clinicians (cognitive participation)</p> <p>Measure engagement (cognitive participation)</p> <p>Consider work links (collective action)</p> <p>Appraisal (reflexive monitoring)</p> |
